# Supplementary material for: Antibiotics Used in Empiric Treatment of Ocular Infections Trigger the Bacterial Rcs Stress Response System Independent of Antibiotic Susceptibility
Source: MDPI journal article supplement (doi:10.3390/antibiotics10091033), 2021-08-25
Supplement: s1 [file s1]

**Supplementary Figure for Harshaw, et al. 2021**

From Antibiotics used in empiric treatment of ocular infections trigger the bacterial Rcs stress response system independent of antibiotic susceptibility

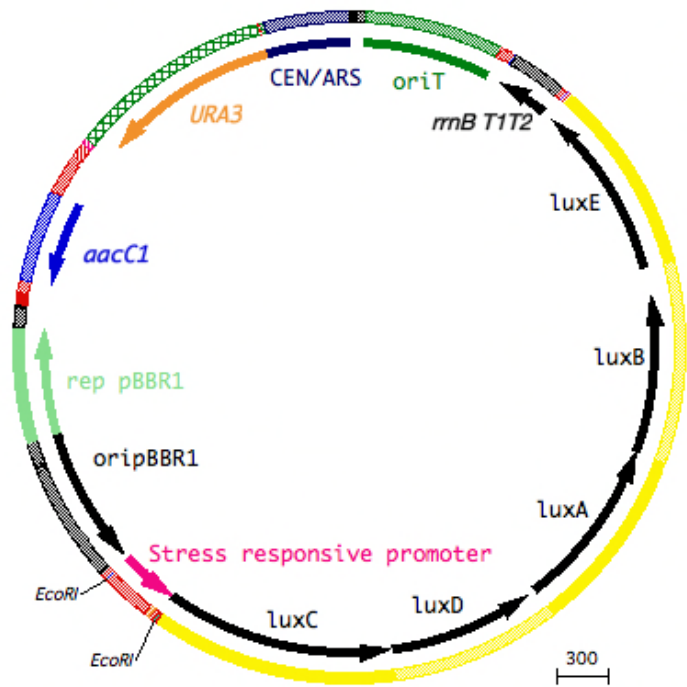

**Figure S1. Diagram of pMQ747 used in this study.** Starting from the origin, the origin of conjugal transfer, *oriT*, is from RP4; the *rmB* T1T2 are transcriptional terminators from *Escherichia coli*. The *luxCDABE* operon provides luminescence. The stress responsive promoter was altered in each of the plasmids used in this study. The *oriPBBR1*-*rep pBBR1* is a broad host-range medium copy replicon that is sufficient for replication in a large number of Gram-negative bacterial species. The *aacC-1* gene provides gentamicin resistance, and the *URA3* and *CEN/ARS* portions allow replication in *Saccharomyces cerevisiae* for recombineering purposes. The size bar represents 300 base pairs.

**Supplemental tables for Antibiotics used in empiric treatment of ocular infections trigger the bacterial Rcs stress response system independent of antibiotic susceptibility**

Nathaniel S. Harshaw, Nicholas A. Stella, Kara M. Lehner, Eric G. Romanowski, Regis P. Kowalski, and Robert M.Q. Shanks

**Table S1. *S. marcescens* strains and plasmids used in this study.**

| Strain                         | Description                                                                          | Source     |
|--------------------------------|--------------------------------------------------------------------------------------|------------|
| K904                           | Wild-type <i>S. marcescens</i> keratitis isolate                                     | [1]        |
| $\Delta gumB$                  | K904 with deletion of <i>gumB</i> gene                                               | [2]        |
| $\Delta rcsB$                  | K904 with <i>rscB</i> ORF replaced by <i>mClover</i>                                 | [3]        |
| $\Delta gumB$<br>$\Delta rcsB$ | K904 with deletion mutations of <i>gumB</i> and <i>rscB</i>                          | [3]        |
| S17-1 $\lambda$ - <i>pir</i>   | <i>Escherichia coli</i> conjugal plasmid donor strain                                | [4]        |
| pMQ414                         | pBBR1-replicon plasmid with <i>nptII</i> promoter driving <i>tdtomato</i> expression | [5]        |
| pMQ589                         | RSF1010-IncQ plasmid with <i>nptII</i> promoter driving <i>luxCDABE</i> expression   | This study |
| pMQ670                         | pBBR1-replicon plasmid with <i>xut</i> promoter driving <i>luxCDABE</i> expression   | [6]        |
| pMQ713                         | pBBR1-replicon plasmid with <i>pigA</i> promoter - <i>luxCDABE</i> expression        | [7]        |
| pMQ747                         | pMQ713 with SMDB11_1637 promoter - <i>luxCDABE</i>                                   | This study |
| pMQ748                         | pMQ713 with SMDB11_2817 promoter - <i>luxCDABE</i>                                   | This study |
| pMQ749                         | pMQ713 with SMDB11_1194 promoter - <i>luxCDABE</i>                                   | This study |

**Table S2. Oligonucleotides used in this study.**

| Name of sequence    | Sequence (5' to 3')                                                                                                                                                                                                                                                                                                                                                                                                                                                                                                                                               |
|---------------------|-------------------------------------------------------------------------------------------------------------------------------------------------------------------------------------------------------------------------------------------------------------------------------------------------------------------------------------------------------------------------------------------------------------------------------------------------------------------------------------------------------------------------------------------------------------------|
| 3805                | agaccgcttctgcgttctgatttaatctgtatca <u>GGATCCT</u> CAACTATCAAACGCTTCGG                                                                                                                                                                                                                                                                                                                                                                                                                                                                                             |
| 3806                | gatcaagatctgatcaagagacaggatgagga <u>GAATTC</u> ATGACTAAAAAAATTCATTCA                                                                                                                                                                                                                                                                                                                                                                                                                                                                                              |
| 4858<br>SMDB11_1637 | ttgcactaaatcatcactttcgggaagatttcaacctggccggttaatgatgaatgaaatcttttagtcat <u>GAATTC</u><br>TTCCTGGTAAATTGGCTGATTAATGGATTAAAAATAATCCGATTAAACC<br>CACCGGTAGAAGTTGGGATGAATGTATTCTCCGAAAGAAAATCGAAC<br>AGGTAAAAATTCTTAATTTTTCGGCGGTGAAAAGCGATTGCTCGCCGA<br>ATGTGCGGCCACCGACAAAACCGTGGGTCTATACTGGGAAGACGCCTC<br>GCGGGGTGCGGGGCACACACTCTGGAGGCCGCCATGTCCGATCTCGTT<br>TCCGCGTCCGGCAAACCGGTGAAAATCCCCGGCCCGGACCACCAATC<br>ACCTTGACCCGCCATCCGGCGCGGGTTGTCGTGCTGCTGCCGGTCAG<br>ACCCTGGCCGACAGTCGCAGAATTCgtcgactccagtcgggaacctgtcgtgccagctgca<br>ttaatgcgccctacgggcttgct       |
| 4860<br>SMDB11_2817 | ttgcactaaatcatcactttcgggaagatttcaacctggccggttaatgatgaatgaaatcttttagtcat <u>GAATTC</u><br>CTTCTCCTTCCCGCTTGCGCGGCCTGGCCGTTTGTCACTTTATGAAGCG<br>CGTTCATCAGTTTAAAAAGCGGCCCTATCGTTATTTGCTGCAATATC<br>GGCATCATAGCGCCGCGCATAGGGTTGAATCTGAGAGCCACTCTGAA<br>AATGATGCAGGAGGTTAAGATTTGAGATTTTCTGGAGTATCGCCGCT<br>CGATTGAACGGCGGAATTTGTAAGCGATTACAATAAGATGTTCTCGAT<br>CTGCGCGAGCTCTTCTTCACTGAAGTGACGATTGGCCAGCATGCCCAC<br>CGCGTCTTCTATCTGCGCATTCTTGCTGGCGCCGATCAGCACTGAGGGA<br><u>ATTC</u> gtcgactccagtcgggaacctgtcgtgccagctgcattaatgcgccctacgggcttgctctccgggcttcg<br>ccctg  |
| 4862<br>SMDB11_1194 | gattgcactaaatcatcactttcgggaagatttcaacctggccggttaatgatgaatgaaatcttttagtcat <u>GAATT</u><br><u>C</u> AGGAAACCTCCTGAAAGTGTTACCACGCATTTTTTCCGGGGTCTGTTA<br>CCGGCATGGCACCGCGCTTATTATTTTGCATGGGCGGCTTGCGGTAT<br>CCCGGTTTACGGCGTGCGCGACGCGCCGTCTGTAAACGAGGTAAAGTC<br>TGCACAATGATTTGAGGGCTCGCAATAAGACAAGGGGACCAAAAATG<br>CGGAAAACGGCCGTTTTGCCGTTGTTTAGGAGGAATCTTAAGAATTT<br>TACCCATGTCGGCGACAGCTTATGCTGAAGAATCAAGCAACCGCCGCC<br>GTTAGCCTCGCCCCGCCATAAAAAAACCCGCGCAGGCGAACCGGCGC<br>GGGGAATTCgtcgactccagtcgggaacctgtcgtgccagctgcattaatgcgccctacgggcttgctctcc<br>gggcttcgcc |

Lower case sequence represents DNA for targeting recombination, upper case is for priming or promoter sequence. Underlined sequence indicates an introduced restriction enzyme cleavage site.

## References

1. Kalivoda, E.J.; Stella, N.A.; Aston, M.A.; Fender, J.E.; Thompson, P.P.; Kowalski, R.P.; Shanks, R.M. Cyclic AMP negatively regulates prodigiosin production by *Serratia marcescens*. *Res Microbiol* **2010**, *161*, 158-167, doi:S0923-2508(09)00256-3 [pii]10.1016/j.resmic.2009.12.004.
2. Stella, N.A.; Brothers, K.M.; Callaghan, J.D.; Passerini, A.M.; Sigindere, C.; Hill, P.J.; Liu, X.; Wozniak, D.J.; Shanks, R.M.Q. An IgaA/UmoB-family protein from *Serratia marcescens* regulates motility, capsular polysaccharide, and secondary metabolite production. *Appl Environ Microbiol* **2018**, *84*, pii: e02575-02517, doi:10.1128/AEM.02575-17.
3. Lehner, K.M.; Stella, N.A.; Calvario, R.C.; Shanks, R.M.Q. mCloverBlaster: a tool to make markerless deletions and fusion using lambda red and I-SceI in Gram-negative bacterial genomes. *J Microbiol Methods* **2020**, *178*, doi:10.1016/j.mimet.2020.106058.
4. Miller, V.L.; Mekalanos, J.J. A novel suicide vector and its use in construction of insertion mutations: osmoregulation of outer membrane proteins and virulence determinants in *Vibrio cholerae* requires *toxR*. *J Bacteriol* **1988**, *170*, 2575, doi:DOI: 10.1128/jb.170.6.2575-2583.1988.
5. Mukherjee, S.; Brothers, K.M.; Shanks, R.M.; Kadouri, D.E. Visualizing *Bdellovibrio bacteriovorus* by Using the tdTomato Fluorescent Protein. *Appl Environ Microbiol* **2015**, *82*, 1653-1661, doi:10.1128/AEM.03611-15.
6. Callaghan, J.D.; Stella, N.A.; Lehner, K.M.; Treat, B.R.; Brothers, K.M.; St Leger, A.J.; Shanks, R.M.Q. Generation of Xylose-inducible promoter tools for *Pseudomonas* species and their use in implicating a role for the Type II secretion system protein XcpQ in inhibition of corneal epithelial wound closure. *Appl Environ Microbiol* **2020**, doi:10.1128/AEM.00250-20.
7. Romanowski, E.G.; Lehner, K.M.; Martin, N.C.; Patel, K.R.; Callaghan, J.D.; Stella, N.A.; Shanks, R.M.Q. Thermoregulation of prodigiosin biosynthesis by *Serratia marcescens* is controlled at the transcriptional level and requires HexS. *Pol J Microbiol* **2019**, *68*, 43-50, doi:doi: 10.21307/pjm-2019-005.
